# Supplementary material for: Fungi in soil and understory have coupled distribution patterns
Source: PubMed Central journal article supplement (PMC8462376; doi:10.7717/peerj.11915), 2021-09-21

## Soil and leaf fungi have coupled distribution patterns

André Boraks, Anthony S. Amend

PeerJ, 2021

### Supplemental Figure S3

Generalist OTUs of the same transect were selected (Fig S2) and mapped (Fig 4). This supplemental contains the semi-variogram models, error estimation and kriged surfaces associated with Figure 4.

## OTU97\_228 Transect 6 Leaf

Kriging prediction

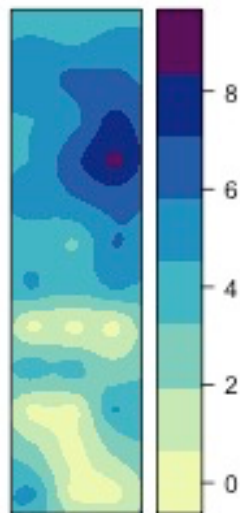

Kriging standard error

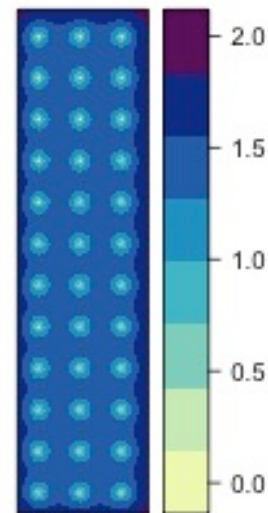

Experimental variogram and fitted variogram model

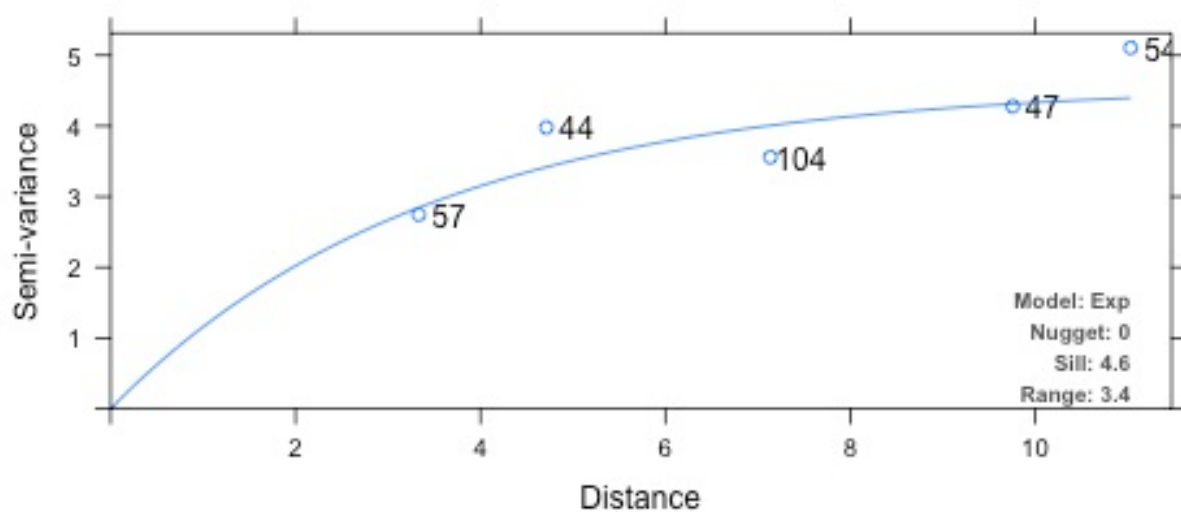

## Soil and leaf fungi have coupled distribution patterns

André Boraks, Anthony S. Amend

PeerJ, 2021

### Supplemental Figure S3

Generalist OTUs of the same transect were selected (Fig S2) and mapped (Fig 4). This supplemental contains the semi-variogram models, error estimation and kriged surfaces associated with Figure 4.

## OTU97\_228 Transect 6 Soil

Kriging prediction

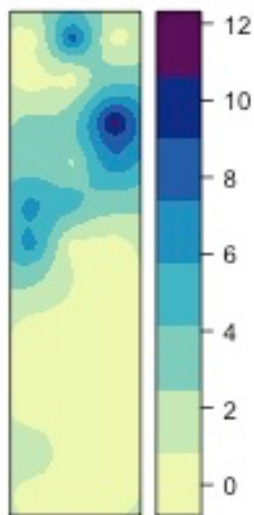

Kriging standard error

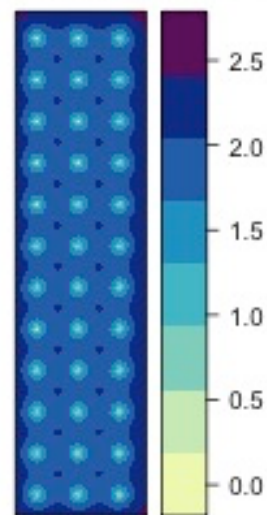

Experimental variogram and fitted variogram model

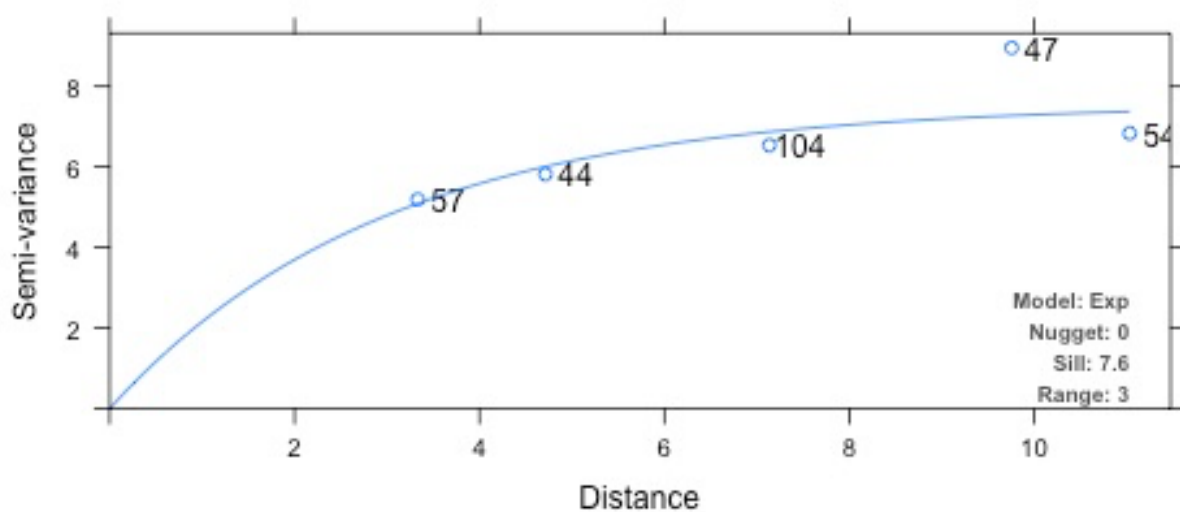

## Soil and leaf fungi have coupled distribution patterns

André Boraks, Anthony S. Amend

PeerJ, 2021

### Supplemental Figure S3

Generalist OTUs of the same transect were selected (Fig S2) and mapped (Fig 4). This supplemental contains the semi-variogram models, error estimation and kriged surfaces associated with Figure 4.

## OTU97\_257 Transect 12 Leaf

Kriging prediction

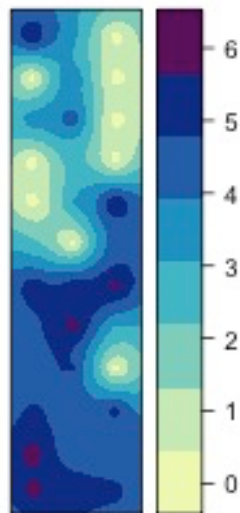

Kriging standard error

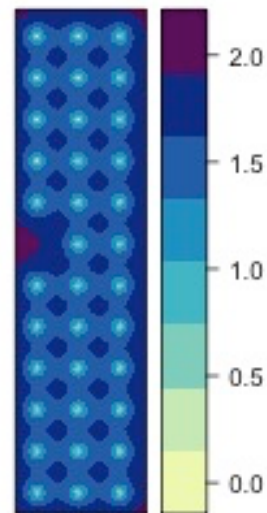

Experimental variogram and fitted variogram model

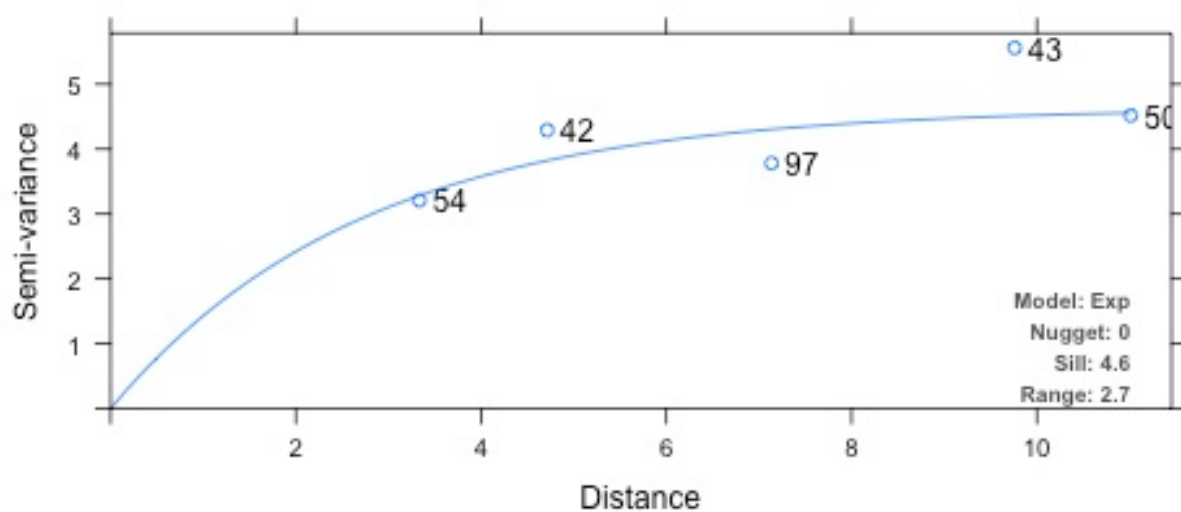

## Soil and leaf fungi have coupled distribution patterns

André Boraks, Anthony S. Amend

PeerJ, 2021

### Supplemental Figure S3

Generalist OTUs of the same transect were selected (Fig S2) and mapped (Fig 4). This supplemental contains the semi-variogram models, error estimation and kriged surfaces associated with Figure 4.

## OTU97\_257 Transect 12 Soil

Kriging prediction

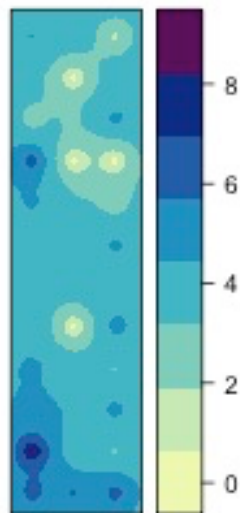

Kriging standard error

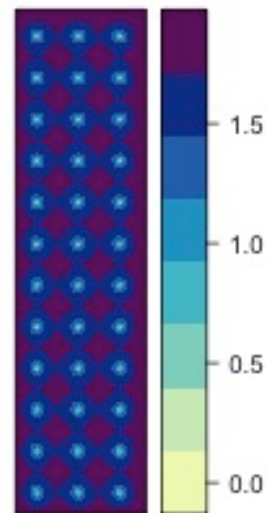

Experimental variogram and fitted variogram model

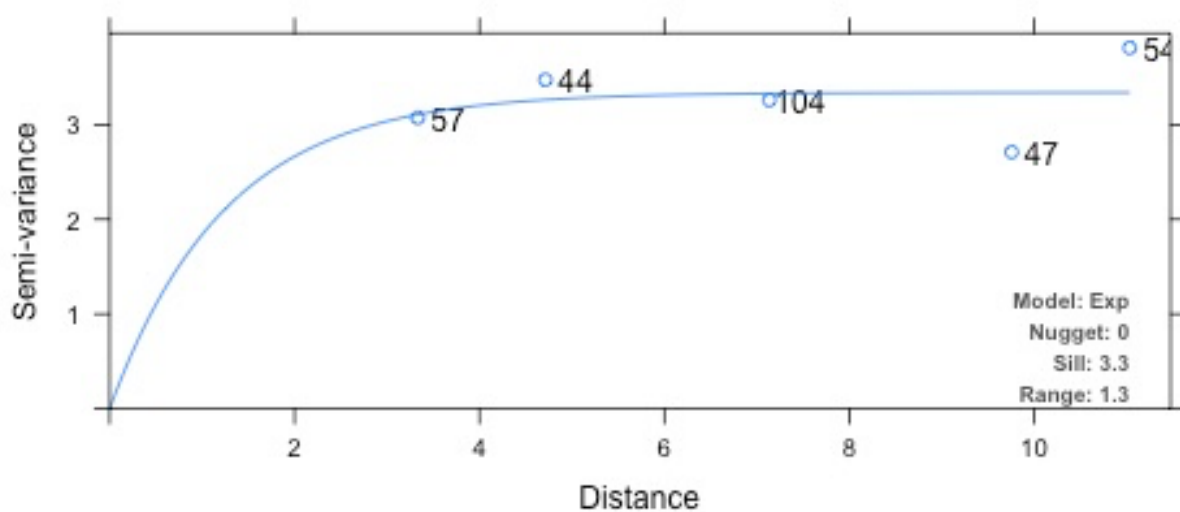

## Soil and leaf fungi have coupled distribution patterns

André Boraks, Anthony S. Amend

PeerJ, 2021

### Supplemental Figure S3

Generalist OTUs of the same transect were selected (Fig S2) and mapped (Fig 4). This supplemental contains the semi-variogram models, error estimation and kriged surfaces associated with Figure 4.

## OTU97\_1160 Transect 12 Leaf

Kriging prediction

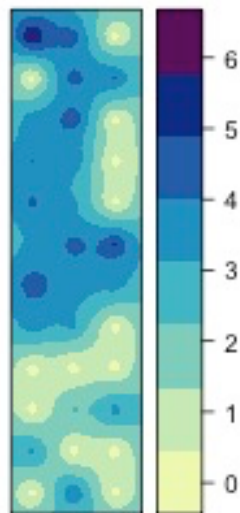

Kriging standard error

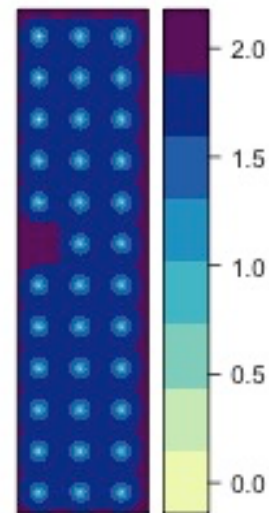

Experimental variogram and fitted variogram model

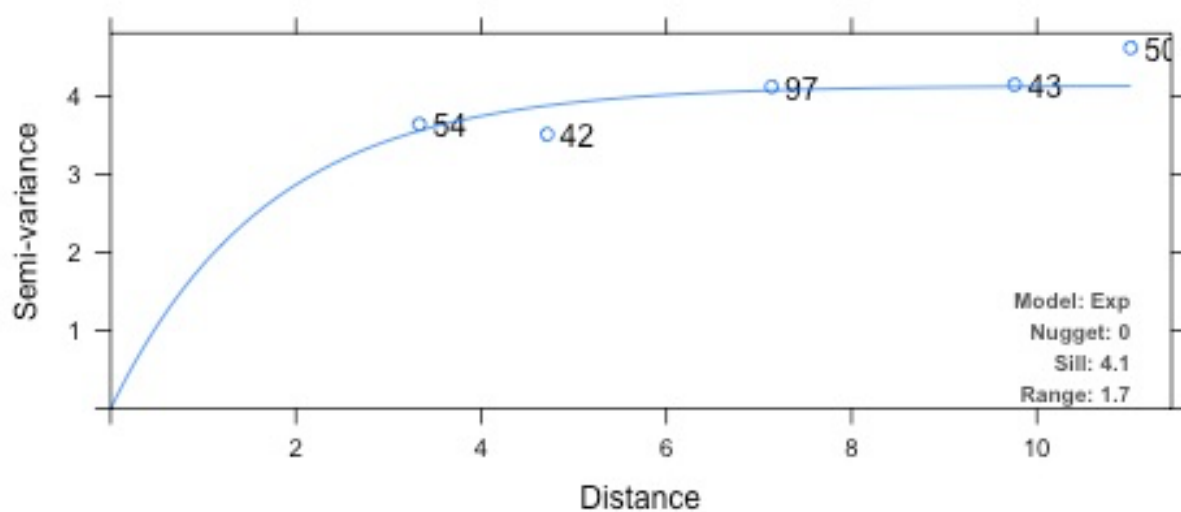

## Soil and leaf fungi have coupled distribution patterns

André Boraks, Anthony S. Amend

PeerJ, 2021

### Supplemental Figure S3

Generalist OTUs of the same transect were selected (Fig S2) and mapped (Fig 4). This supplemental contains the semi-variogram models, error estimation and kriged surfaces associated with Figure 4.

## OTU97\_1160 Transect 12 Soil

Kriging prediction

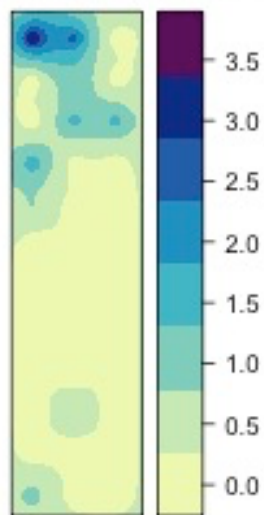

Kriging standard error

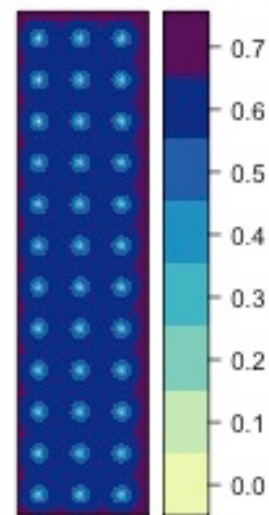

Experimental variogram and fitted variogram model

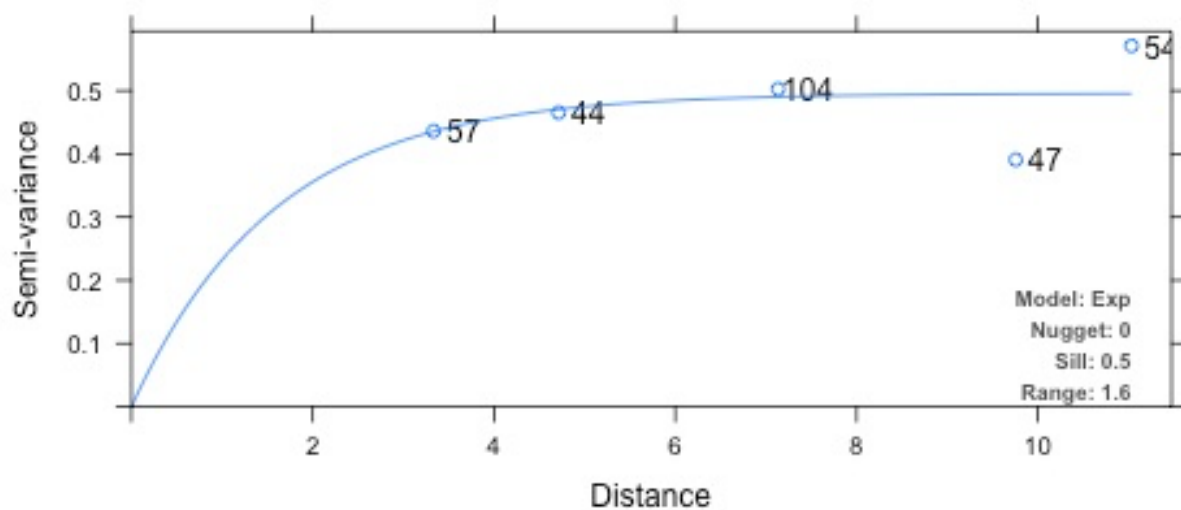

## Soil and leaf fungi have coupled distribution patterns

André Boraks, Anthony S. Amend

PeerJ, 2021

### Supplemental Figure S3

Generalist OTUs of the same transect were selected (Fig S2) and mapped (Fig 4). This supplemental contains the semi-variogram models, error estimation and kriged surfaces associated with Figure 4.

## OTU97\_1992 Transect 1 Leaf

Kriging prediction

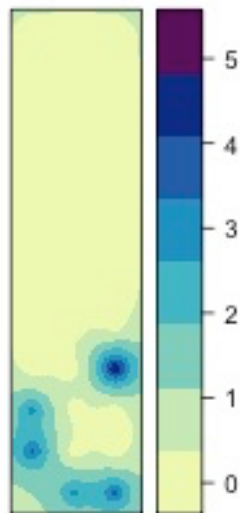

Kriging standard error

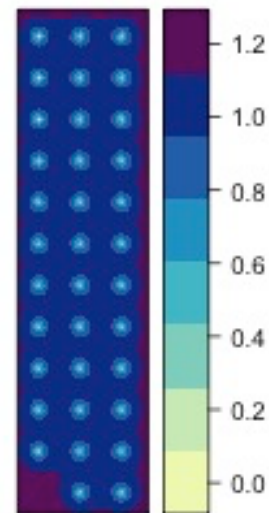

Experimental variogram and fitted variogram model

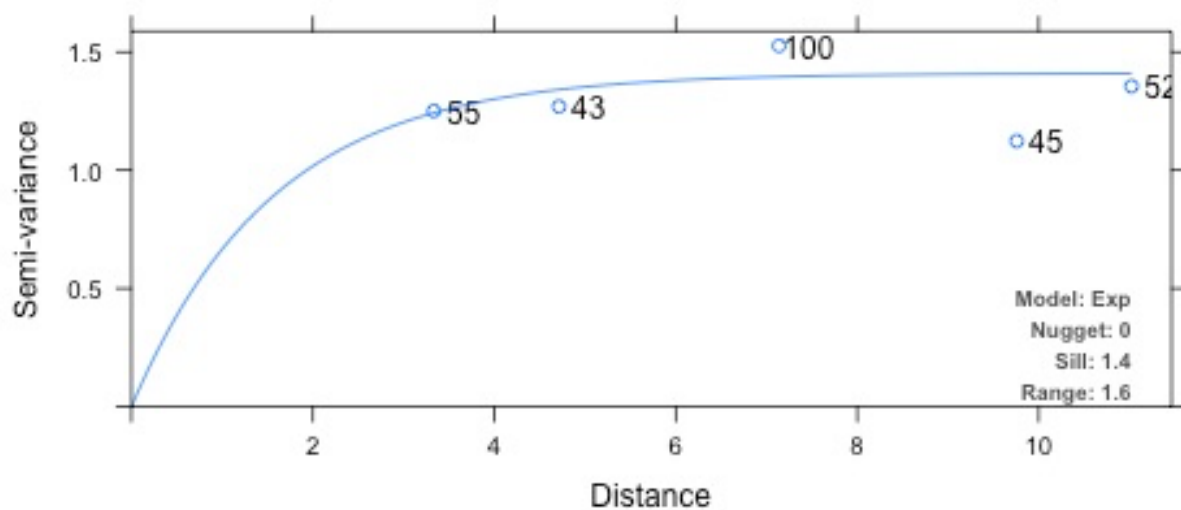

## Soil and leaf fungi have coupled distribution patterns

André Boraks, Anthony S. Amend

PeerJ, 2021

### Supplemental Figure S3

Generalist OTUs of the same transect were selected (Fig S2) and mapped (Fig 4). This supplemental contains the semi-variogram models, error estimation and kriged surfaces associated with Figure 4.

## OTU97\_1992 Transect 1 Soil

Kriging prediction

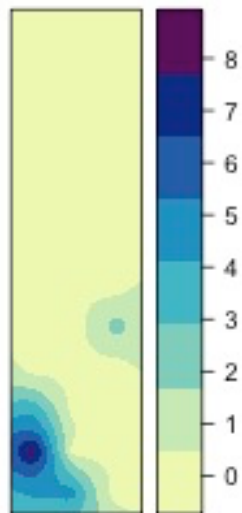

Kriging standard error

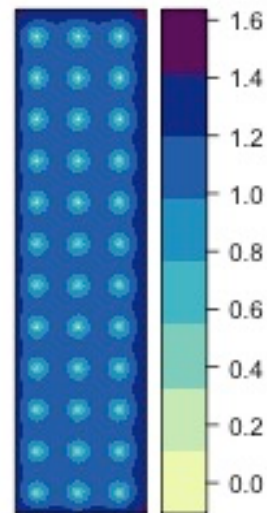

Experimental variogram and fitted variogram model

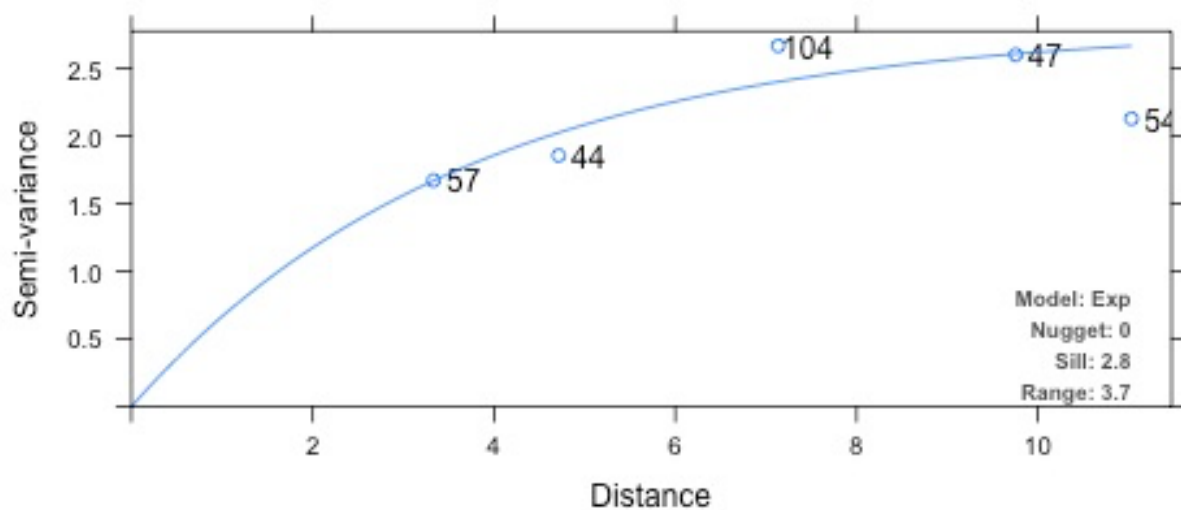



## Soil and leaf fungi have coupled distribution patterns

André Boraks, Anthony S. Amend

PeerJ, 2021

### Supplemental Figure S3

Generalist OTUs of the same transect were selected (Fig S2) and mapped (Fig 4). This supplemental contains the semi-variogram models, error estimation and kriged surfaces associated with Figure 4.

## OTU97\_2240 Transect 1 Leaf

Kriging prediction

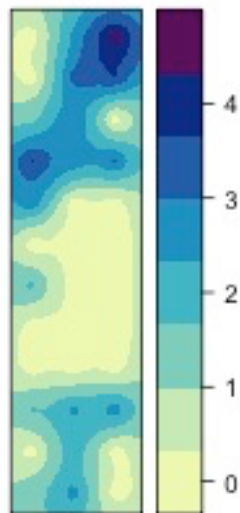

Kriging standard error

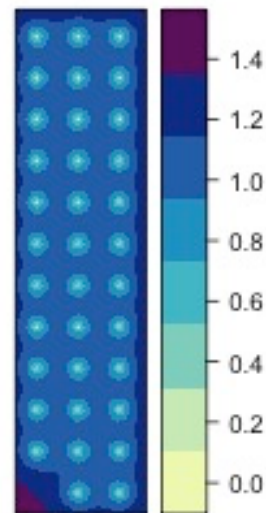

Experimental variogram and fitted variogram model

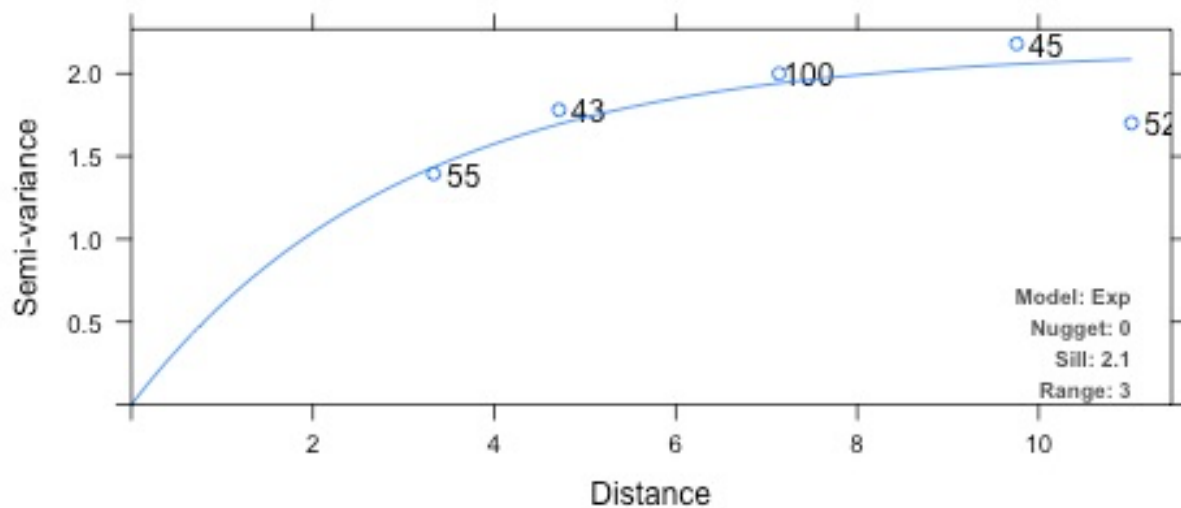

## Soil and leaf fungi have coupled distribution patterns

André Boraks, Anthony S. Amend

PeerJ, 2021

### Supplemental Figure S3

Generalist OTUs of the same transect were selected (Fig S2) and mapped (Fig 4). This supplemental contains the semi-variogram models, error estimation and kriged surfaces associated with Figure 4.

## OTU97\_2240 Transect 1 Soil

Kriging prediction

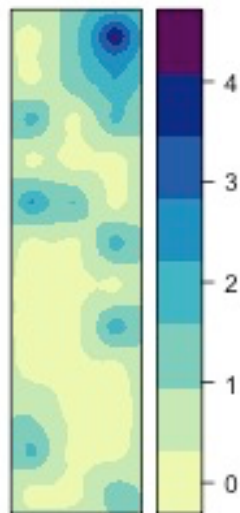

Kriging standard error

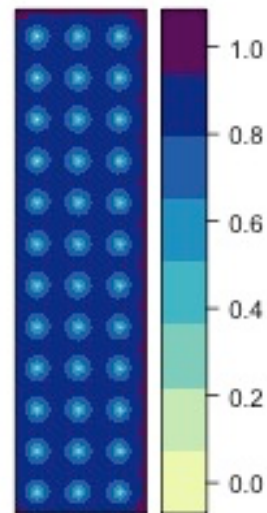

Experimental variogram and fitted variogram model

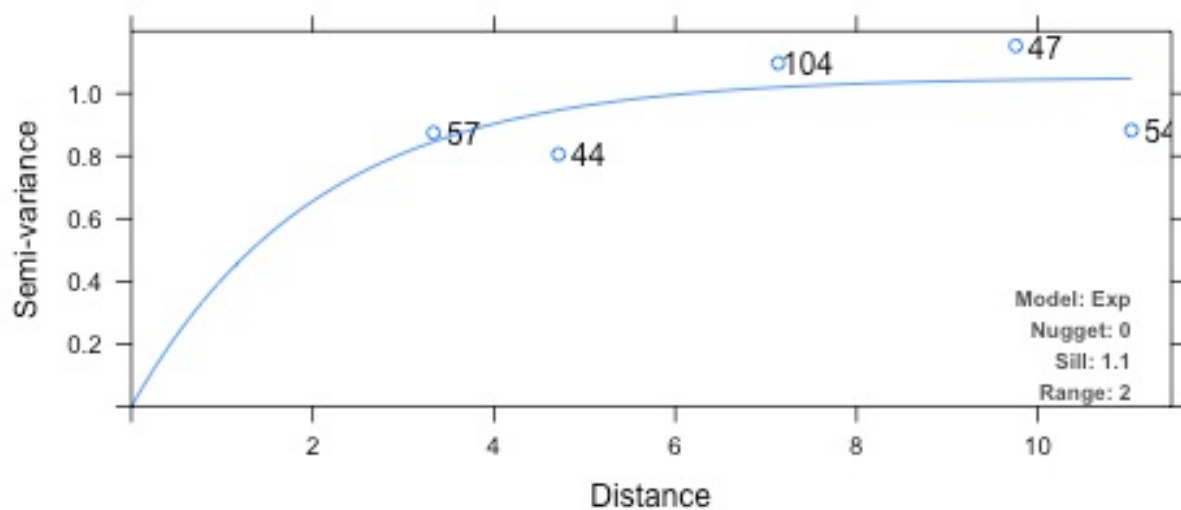

## Soil and leaf fungi have coupled distribution patterns

André Boraks, Anthony S. Amend

PeerJ, 2021

### Supplemental Figure S3

Generalist OTUs of the same transect were selected (Fig S2) and mapped (Fig 4). This supplemental contains the semi-variogram models, error estimation and kriged surfaces associated with Figure 4.

## OTU97\_2608 Transect 6 Leaf

Kriging prediction

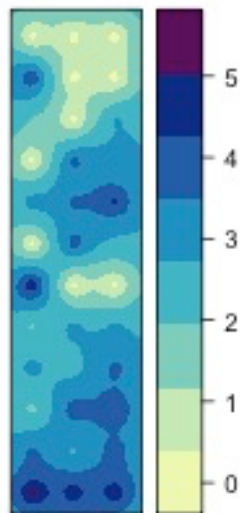

Kriging standard error

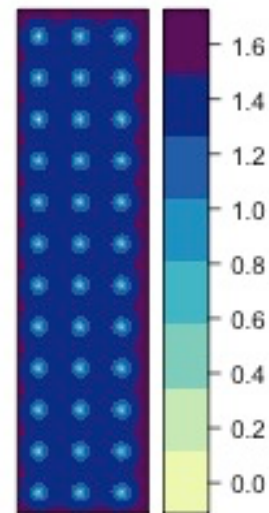

Experimental variogram and fitted variogram model

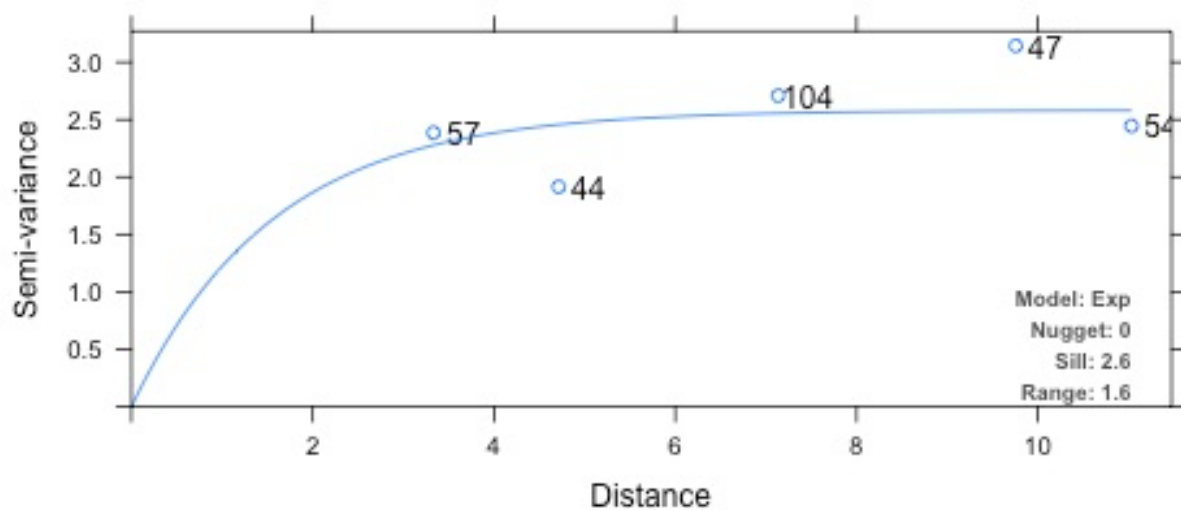

## Soil and leaf fungi have coupled distribution patterns

André Boraks, Anthony S. Amend

PeerJ, 2021

### Supplemental Figure S3

Generalist OTUs of the same transect were selected (Fig S2) and mapped (Fig 4). This supplemental contains the semi-variogram models, error estimation and kriged surfaces associated with Figure 4.

## OTU97\_2608 Transect 6 Soil

Kriging prediction

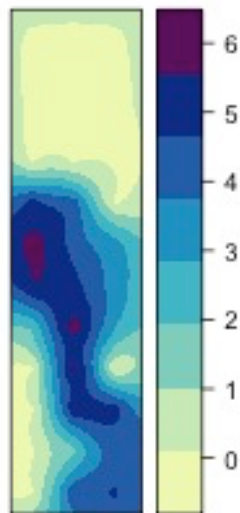

Kriging standard error

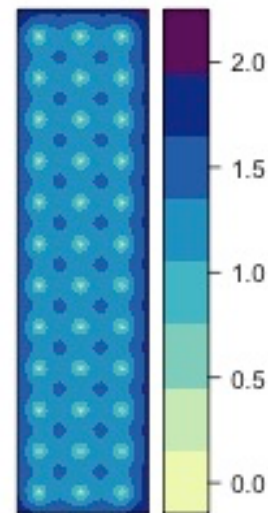

Experimental variogram and fitted variogram model

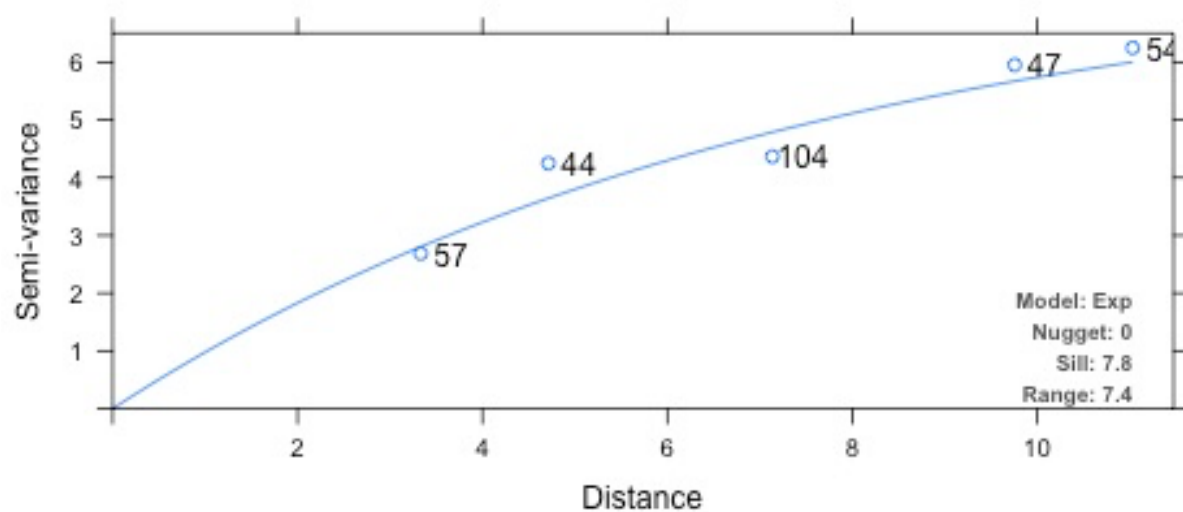

## Soil and leaf fungi have coupled distribution patterns

André Boraks, Anthony S. Amend

PeerJ, 2021

### Supplemental Figure S3

Generalist OTUs of the same transect were selected (Fig S2) and mapped (Fig 4). This supplemental contains the semi-variogram models, error estimation and kriged surfaces associated with Figure 4.

## OTU97\_2833 Transect 1 Leaf

Kriging prediction

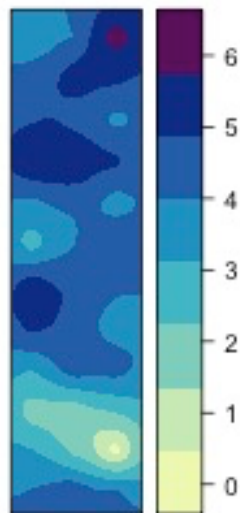

Kriging standard error

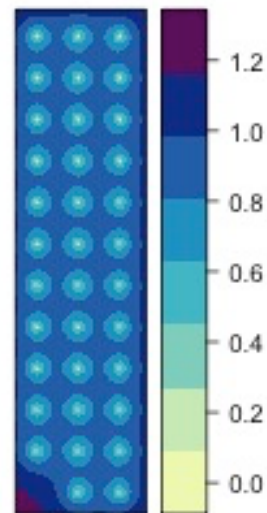

Experimental variogram and fitted variogram model

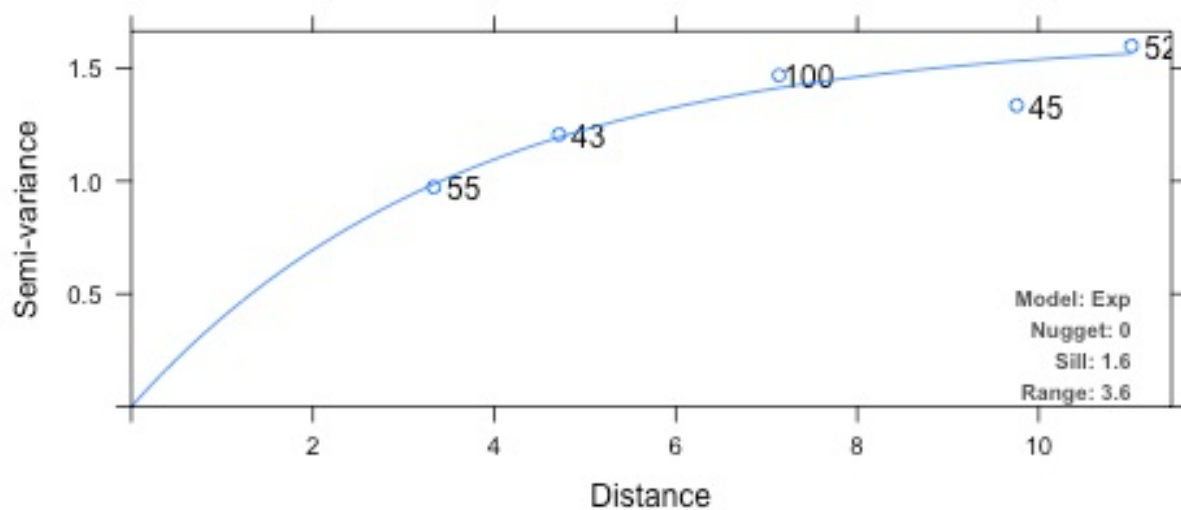

## Soil and leaf fungi have coupled distribution patterns

André Boraks, Anthony S. Amend

PeerJ, 2021

### Supplemental Figure S3

Generalist OTUs of the same transect were selected (Fig S2) and mapped (Fig 4). This supplemental contains the semi-variogram models, error estimation and kriged surfaces associated with Figure 4.

## OTU97\_2833 Transect 1 Soil

Kriging prediction

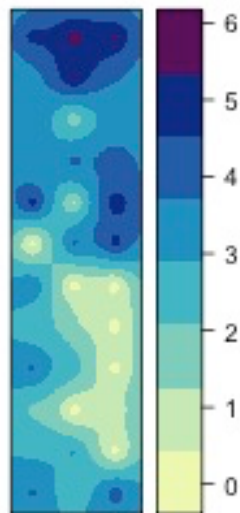

Kriging standard error

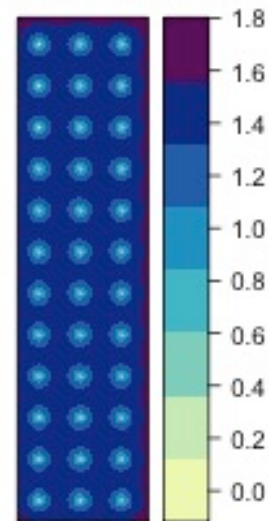

Experimental variogram and fitted variogram model

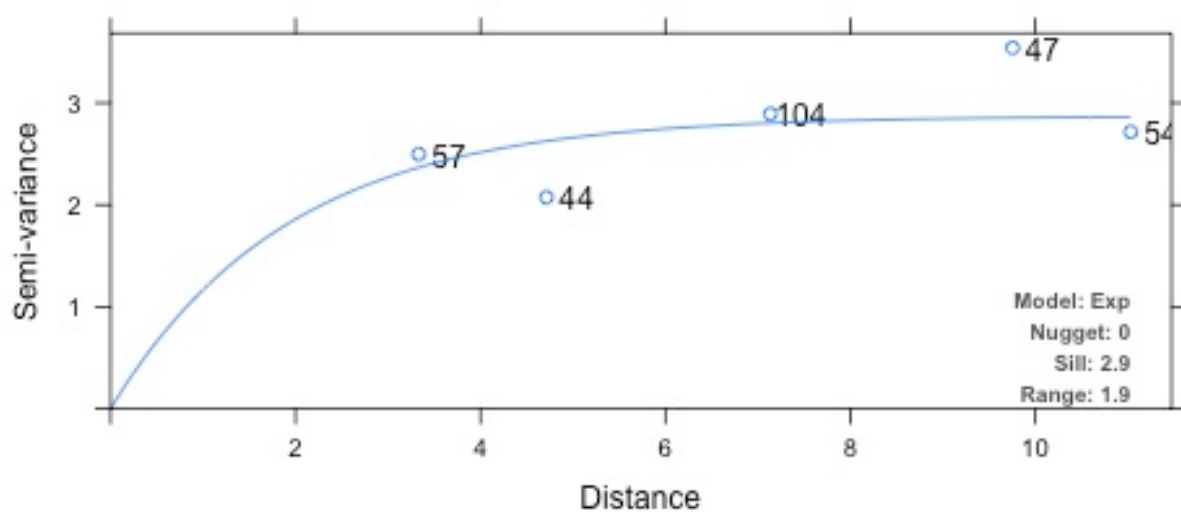

## Soil and leaf fungi have coupled distribution patterns

André Boraks, Anthony S. Amend

PeerJ, 2021

### Supplemental Figure S3

Generalist OTUs of the same transect were selected (Fig S2) and mapped (Fig 4). This supplemental contains the semi-variogram models, error estimation and kriged surfaces associated with Figure 4.

## OTU97\_3832 Transect 1 Leaf

Kriging prediction

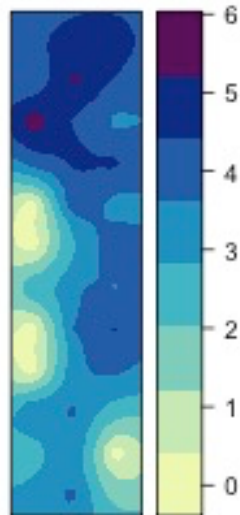

Kriging standard error

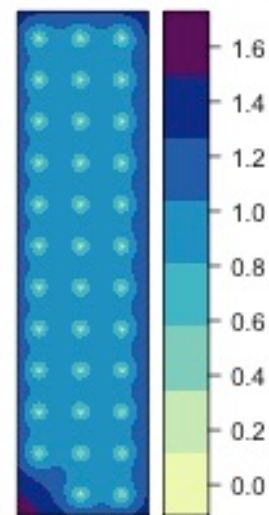

Experimental variogram and fitted variogram model

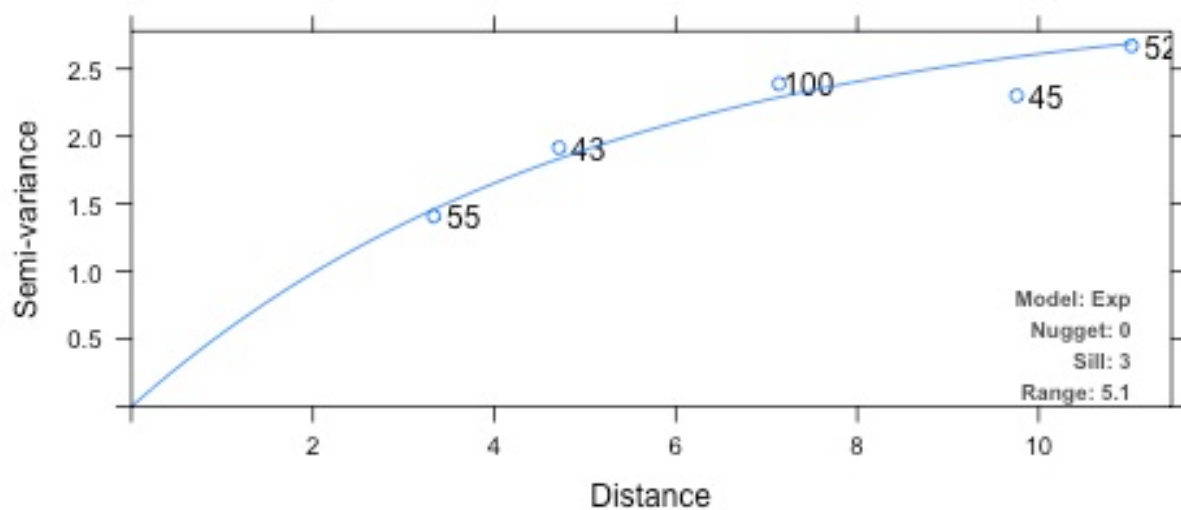

## Soil and leaf fungi have coupled distribution patterns

André Boraks, Anthony S. Amend

PeerJ, 2021

### Supplemental Figure S3

Generalist OTUs of the same transect were selected (Fig S2) and mapped (Fig 4). This supplemental contains the semi-variogram models, error estimation and kriged surfaces associated with Figure 4.

## OTU97\_3832 Transect 1 Soil

Kriging prediction

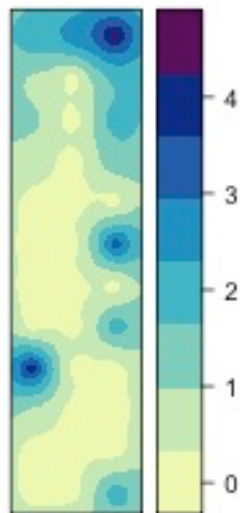

Kriging standard error

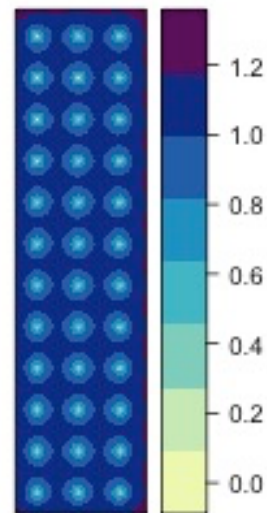

Experimental variogram and fitted variogram model

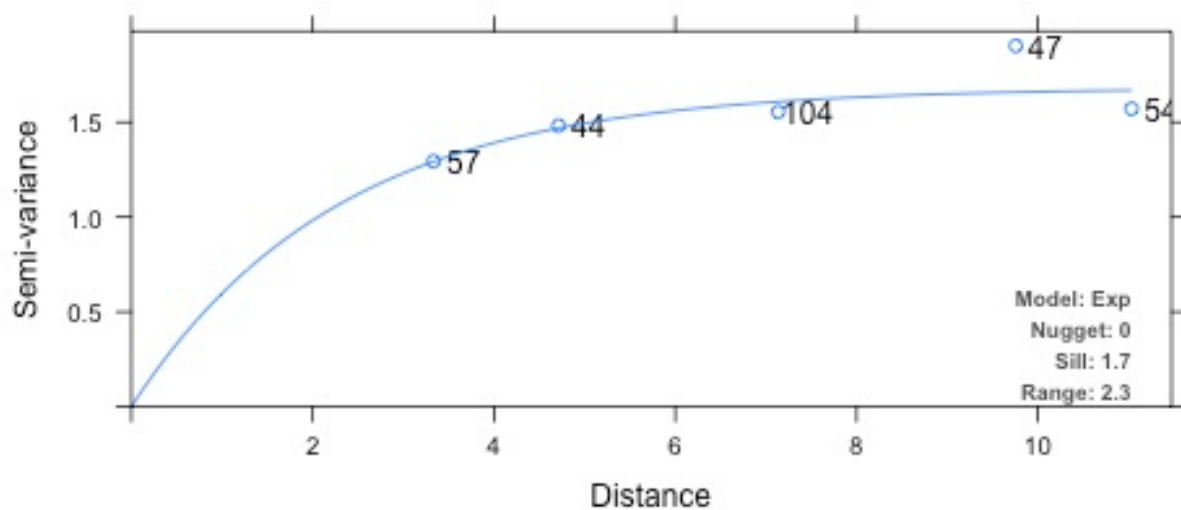



## Soil and leaf fungi have coupled distribution patterns

André Boraks, Anthony S. Amend

PeerJ, 2021

### Supplemental Figure S3

Generalist OTUs of the same transect were selected (Fig S2) and mapped (Fig 4). This supplemental contains the semi-variogram models, error estimation and kriged surfaces associated with Figure 4.

## OTU97\_3832 Transect 6 Leaf

Kriging prediction

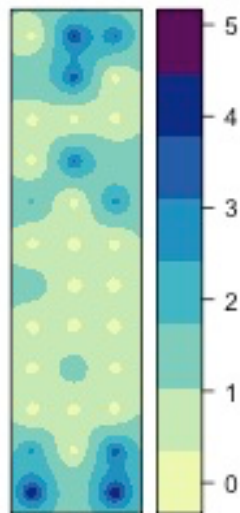

Kriging standard error

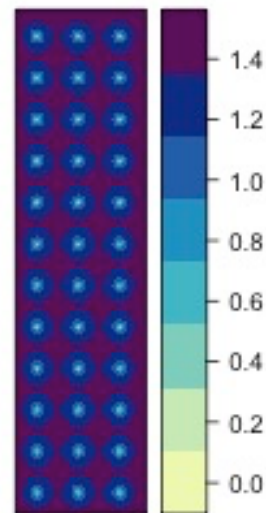

Experimental variogram and fitted variogram model

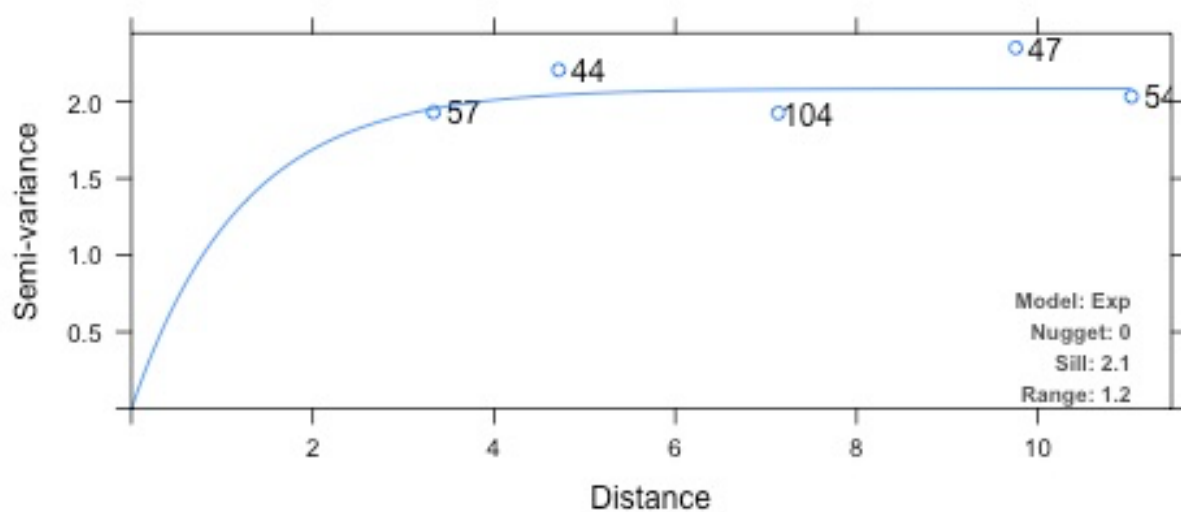

## Soil and leaf fungi have coupled distribution patterns

André Boraks, Anthony S. Amend

PeerJ, 2021

### Supplemental Figure S3

Generalist OTUs of the same transect were selected (Fig S2) and mapped (Fig 4). This supplemental contains the semi-variogram models, error estimation and kriged surfaces associated with Figure 4.

## OTU97\_3832 Transect 6 Soil

Kriging prediction

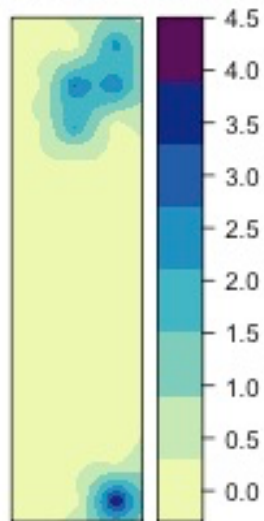

Kriging standard error

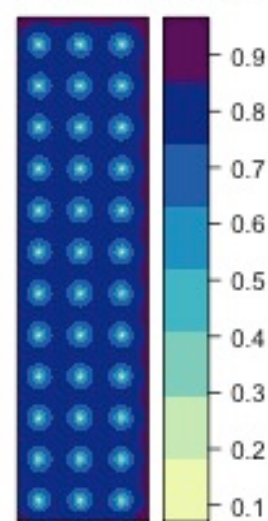

Experimental variogram and fitted variogram model

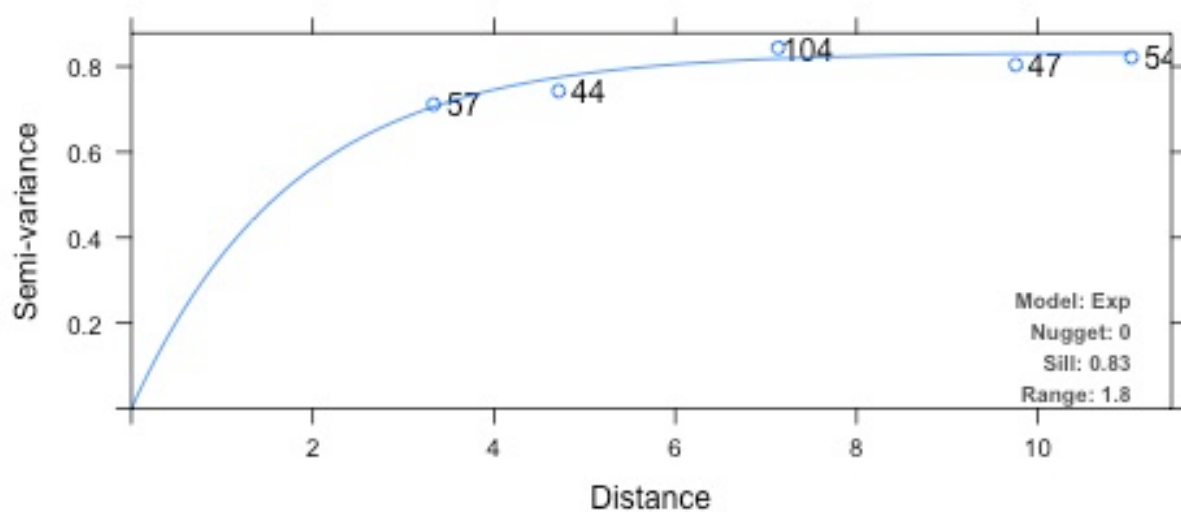

## Soil and leaf fungi have coupled distribution patterns

André Boraks, Anthony S. Amend

PeerJ, 2021

### Supplemental Figure S3

Generalist OTUs of the same transect were selected (Fig S2) and mapped (Fig 4). This supplemental contains the semi-variogram models, error estimation and kriged surfaces associated with Figure 4.

## OTU97\_5320 Transect 10 Leaf

Kriging prediction

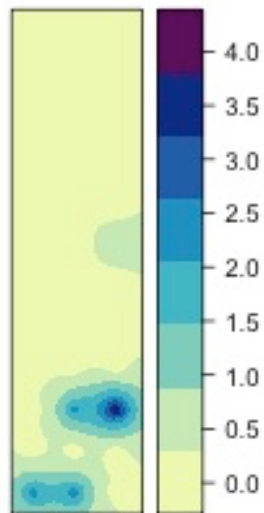

Kriging standard error

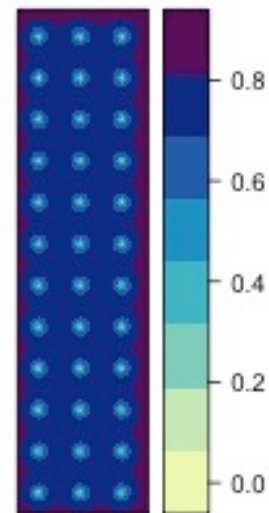

Experimental variogram and fitted variogram model

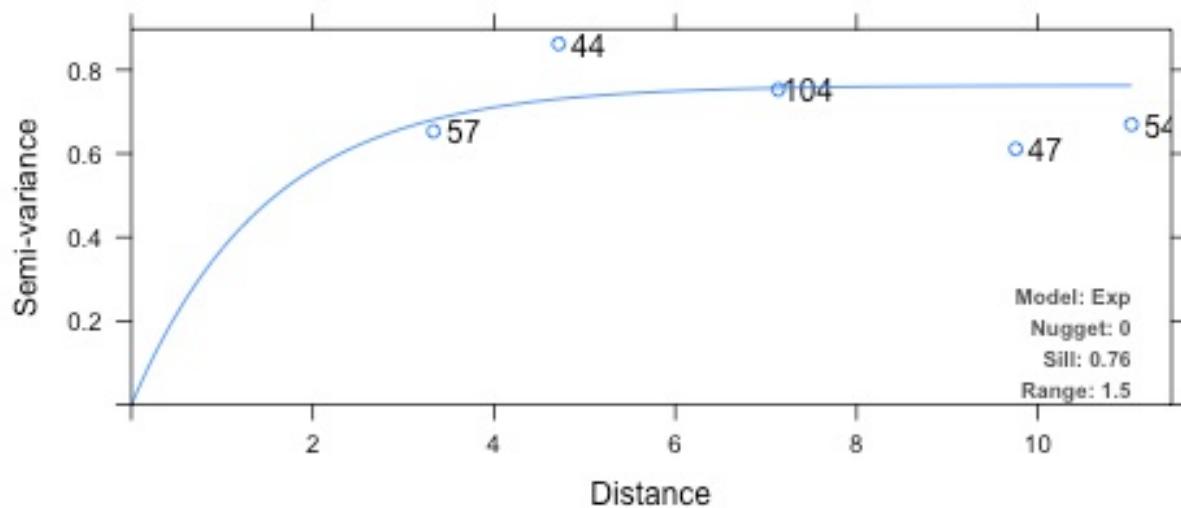

## Soil and leaf fungi have coupled distribution patterns

André Boraks, Anthony S. Amend

PeerJ, 2021

### Supplemental Figure S3

Generalist OTUs of the same transect were selected (Fig S2) and mapped (Fig 4). This supplemental contains the semi-variogram models, error estimation and kriged surfaces associated with Figure 4.

## OTU97\_5320 Transect 10 Soil

Kriging prediction

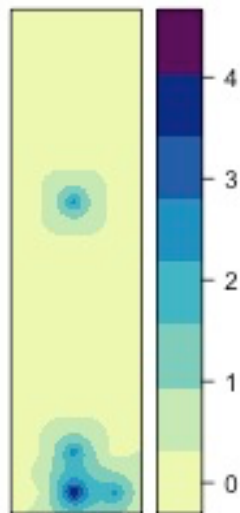

Kriging standard error

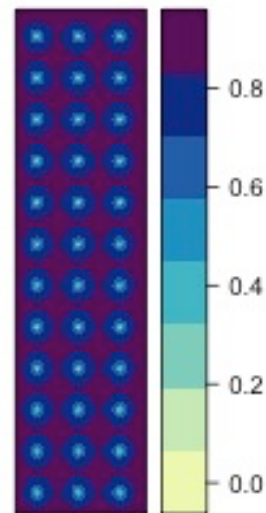

Experimental variogram and fitted variogram model

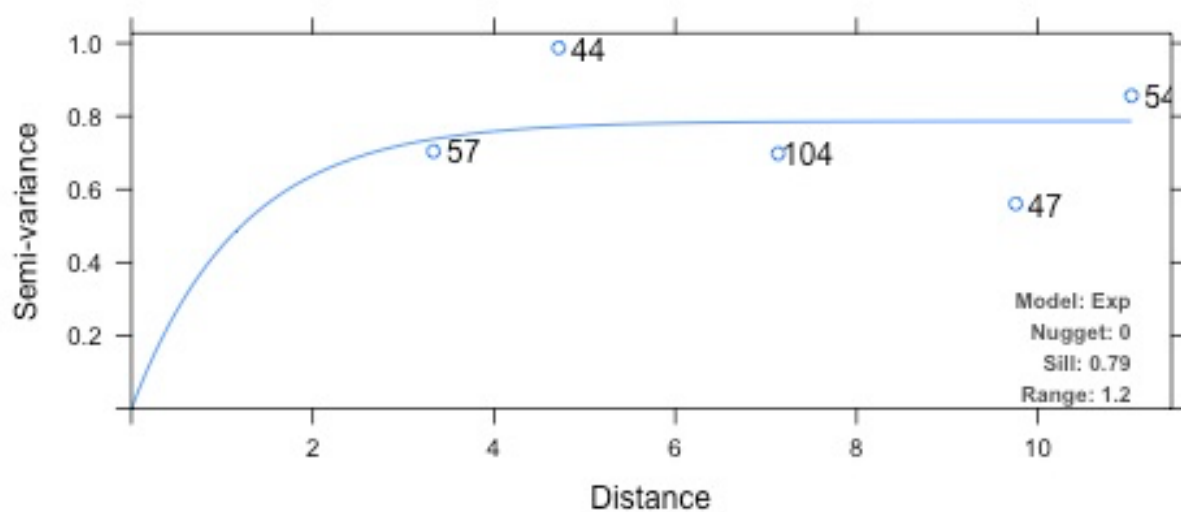

# Soil and leaf fungi have coupled distribution patterns

André Boraks, Anthony S. Amend

PeerJ, 2021

## Supplemental Figure S3

Generalist OTUs of the same transect were selected (Fig S2) and mapped (Fig 4). This supplemental contains the semi-variogram models, error estimation and kriged surfaces associated with Figure 4.

# OTU97\_6890 Transect 6 Leaf

### Kriging prediction

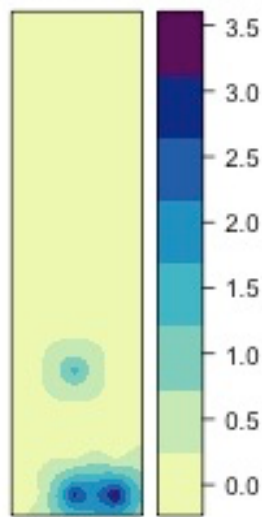

### Kriging standard error

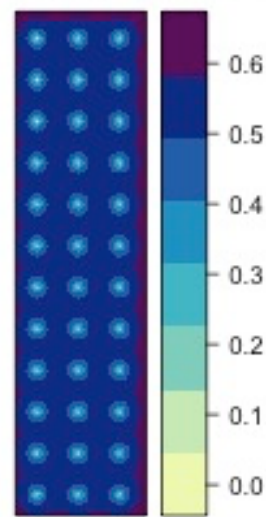

### Experimental variogram and fitted variogram model

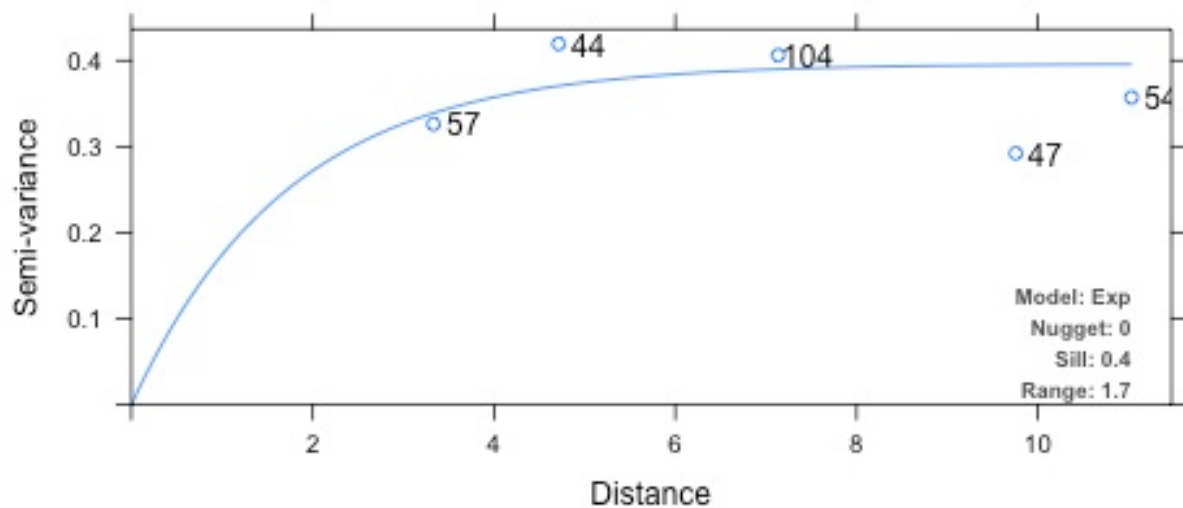

## Soil and leaf fungi have coupled distribution patterns

André Boraks, Anthony S. Amend

PeerJ, 2021

### Supplemental Figure S3

Generalist OTUs of the same transect were selected (Fig S2) and mapped (Fig 4). This supplemental contains the semi-variogram models, error estimation and kriged surfaces associated with Figure 4.

## OTU97\_6890 Transect 6 Soil

### Kriging prediction

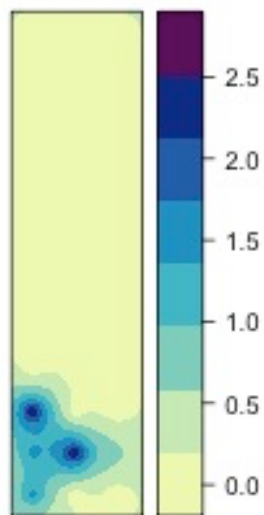

### Kriging standard error

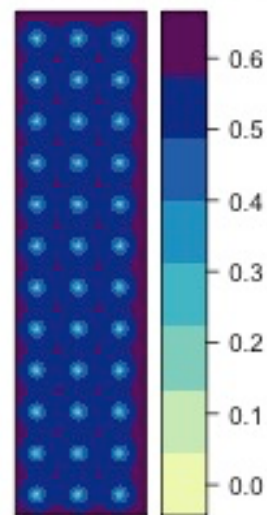

### Experimental variogram and fitted variogram model

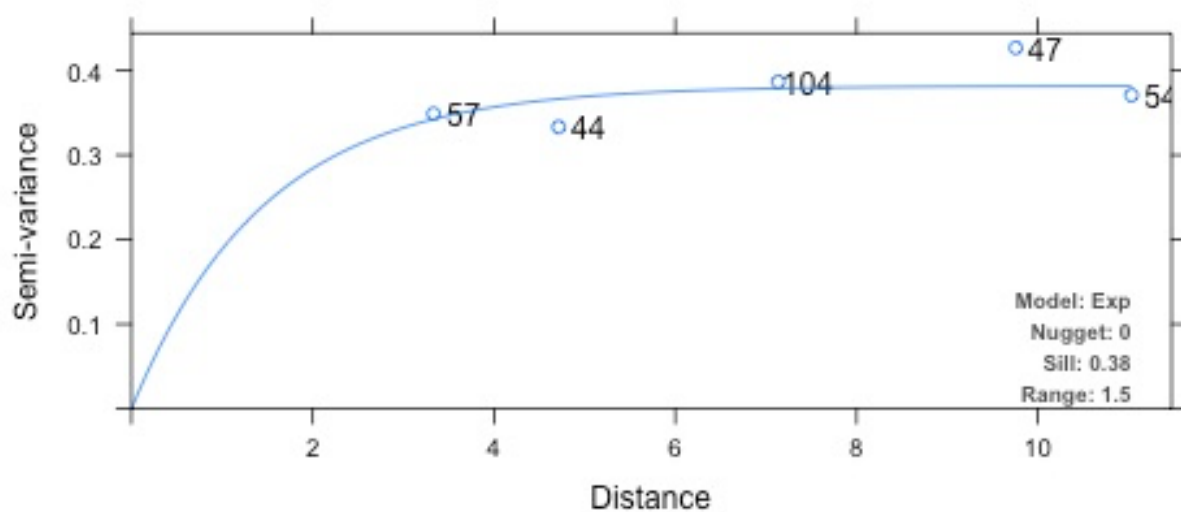

Supplement: peerj-09-11915-s003.pdf [file peerj-09-11915-s003.pdf]
