# Supplementary material for: Fungi in soil and understory have coupled distribution patterns
Source: PubMed Central journal article supplement (PMC8462376; doi:10.7717/peerj.11915), 2021-09-21

# Fungi in soil and understory have coupled distribution patterns

André Boraks, Anthony S. Amend

PeerJ, 2021

## Supplemental Figure S2

Flowchart detailing identification of habitat specialist and habitat generalist fungi and the selection process used identify OTUs included in Figure 4

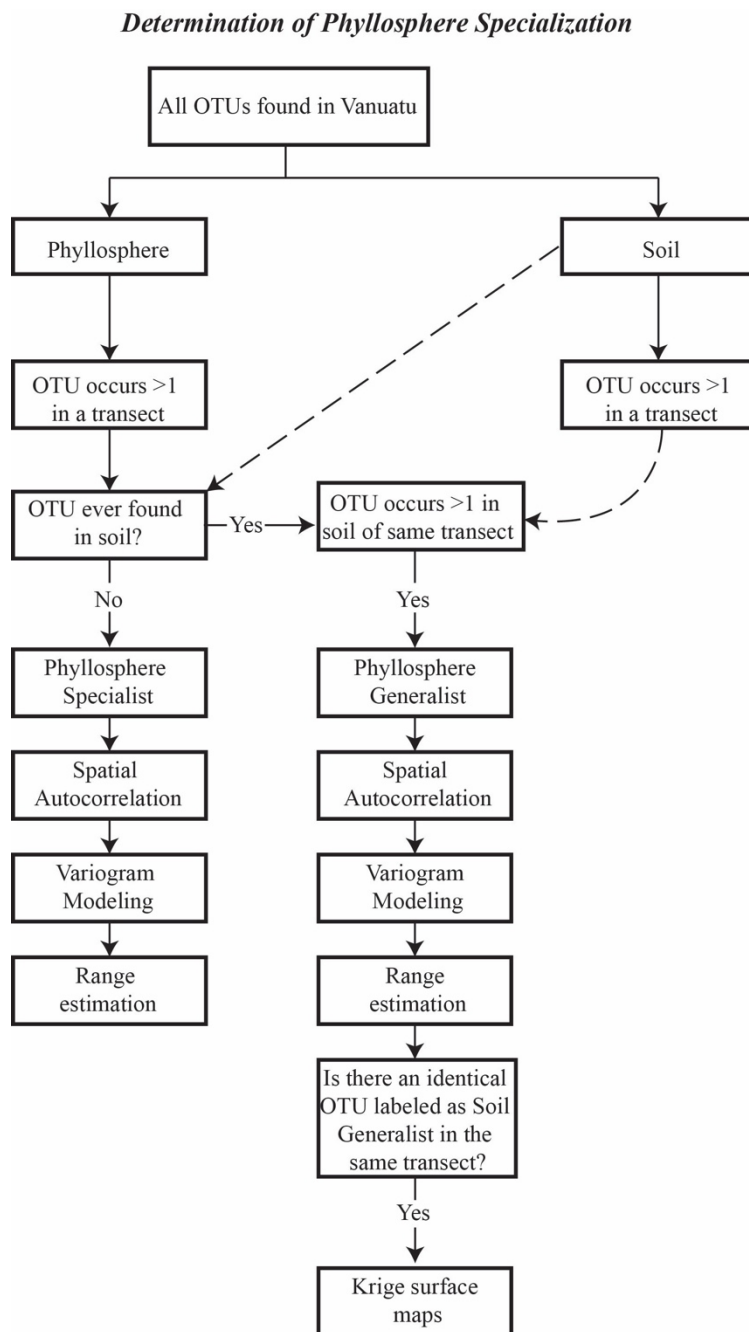

Supplement: peerj-09-11915-s002.pdf [file peerj-09-11915-s002.pdf]
